# Supplementary material for: Smoking tobacco prevalence among college students in the Kingdom of Saudi Arabia: Systematic review and meta-analysis
Source: PubMed Central journal article supplement (PMC6662783; doi:10.18332/tid/105843), 2019-04-19
Supplement: TID-17-35-s1.pdf [file TID-17-35-s1.pdf]

**Supplementary Table 1.** Search strategy

| <b>Databases</b>                            | <b>Search Keywords</b>                                                                                                                                                                                                                                        | <b>Total</b> |
|---------------------------------------------|---------------------------------------------------------------------------------------------------------------------------------------------------------------------------------------------------------------------------------------------------------------|--------------|
| <b>PubMed</b><br><b>(2010-2018)</b>         | (((Smoking[Title/Abstract] OR Tobacco[Title/Abstract] OR Cigarette[Title/Abstract] OR Waterpipe[Title/Abstract])) AND (College[Title/Abstract] OR University[Title/Abstract] OR Students[Title/Abstract])) AND (Saudi[Title/Abstract] OR KSA[Title/Abstract]) | <b>120</b>   |
| <b>Science Direct</b><br><b>(2010-2018)</b> | (Smoking OR Tobacco OR Cigarette OR Waterpipe) AND (College OR University OR Students) AND (Saudi OR KSA); <b>Note: Find articles in: Title, Abstract, Keywords. Restrict research to: Review articles &amp; Research articles.</b>                           | <b>16</b>    |
| <b>APA PsycNET</b><br><b>(2010-2018)</b>    | Any Field: smoking OR Any Field: Tobacco OR Any Field: Cigarette OR Any Field: Waterpipe AND Any Field: College OR Any Field: University OR Any Field: Students AND Any Field: Saudi OR Any Field: KSA AND Peer-Reviewed Journals only AND Year: 2000 To 2018 | <b>71</b>    |
| <b>Web of Science</b><br><b>(2010-2018)</b> | TITLE: (smoking OR tobacco OR Cigarette OR Waterpipe) AND TITLE: (college OR University OR Students) AND TOPIC:(Saudi OR KSA)                                                                                                                                 | <b>46</b>    |
| <b>CINAHL</b><br><b>(2010-2018)</b>         | AB ( smoking OR tobacco OR cigarette Or Waterpipe ) AND AB ( College Or University Or Students ) AND AB ( Saudi OR KSA )                                                                                                                                      | <b>35</b>    |

**Supplementary Table 2.** Quality assessment of included articles based on Russell and Gregory's guidelines<sup>12</sup>.

| #  | Source                      | Year | Q1  | Q2  | Q3  | Q4  | Q5  | Quality Score |
|----|-----------------------------|------|-----|-----|-----|-----|-----|---------------|
| 1  | Abdulghani, <sup>17</sup>   | 2017 | Yes | Yes | No  | Yes | Yes | 4             |
| 2  | Al-Mohaithef, <sup>18</sup> | 2018 | Yes | Yes | Yes | No  | Yes | 4             |
| 3  | Abd El Kader, <sup>19</sup> | 2018 | Yes | Yes | No  | Yes | Yes | 4             |
| 4  | Dar-Odeh, <sup>20</sup>     | 2017 | Yes | Yes | No  | Yes | Yes | 4             |
| 5  | Azhar, <sup>21</sup>        | 2012 | Yes | Yes | Yes | Yes | Yes | 5             |
| 6  | AL-Saegh, <sup>22</sup>     | 2017 | Yes | Yes | Yes | No  | Yes | 4             |
| 7  | Ansari, <sup>23</sup>       | 2017 | Yes | Yes | Yes | No  | Yes | 4             |
| 8  | Awan, <sup>24</sup>         | 2016 | Yes | Yes | No  | Yes | Yes | 4             |
| 9  | Al-Ghaneem, <sup>25</sup>   | 2016 | Yes | Yes | Yes | Yes | Yes | 5             |
| 10 | Ansari, <sup>26</sup>       | 2016 | Yes | Yes | No  | Yes | Yes | 4             |
| 11 | Awan, <sup>27</sup>         | 2016 | Yes | Yes | No  | Yes | Yes | 4             |
| 12 | Koura, <sup>28</sup>        | 2011 | Yes | Yes | Yes | No  | Yes | 4             |
| 13 | Mandil, <sup>29</sup>       | 2010 | Yes | Yes | Yes | Yes | Yes | 5             |
| 14 | Al-Kaabba, <sup>30</sup>    | 2011 | Yes | Yes | No  | Yes | Yes | 4             |
| 15 | Allohidan, <sup>31</sup>    | 2017 | Yes | Yes | Yes | No  | Yes | 4             |
| 16 | AlQahtani, <sup>32</sup>    | 2017 | Yes | Yes | No  | Yes | Yes | 4             |
| 17 | el-Fetoh, <sup>33</sup>     | 2016 | Yes | Yes | No  | Yes | Yes | 4             |
| 18 | Mansour, <sup>34</sup>      | 2015 | Yes | Yes | No  | Yes | Yes | 4             |
| 19 | Shah, <sup>35</sup>         | 2015 | Yes | Yes | Yes | No  | Yes | 4             |
| 20 | Wali, <sup>36</sup>         | 2011 | Yes | Yes | No  | Yes | Yes | 4             |
| 21 | Mahfouz, <sup>37</sup>      | 2014 | Yes | Yes | Yes | Yes | Yes | 5             |
| 22 | AlSwailem, <sup>38</sup>    | 2014 | Yes | Yes | No  | Yes | Yes | 4             |
| 23 | Al-Haqwi, <sup>39</sup>     | 2010 | Yes | Yes | No  | Yes | Yes | 4             |
| 24 | Hassan, <sup>40</sup>       | 2014 | Yes | Yes | No  | Yes | Yes | 4             |
| 25 | Almogbel, <sup>41</sup>     | 2016 | Yes | Yes | No  | Yes | Yes | 4             |
| 26 | Taha, <sup>42</sup>         | 2010 | Yes | Yes | Yes | Yes | Yes | 5             |
| 27 | Al-Mohamed, <sup>43</sup>   | 2010 | Yes | Yes | Yes | No  | Yes | 4             |
| 28 | Almutairi, <sup>44</sup>    | 2016 | Yes | Yes | No  | Yes | Yes | 4             |
| 29 | Torchyan, <sup>45</sup>     | 2016 | Yes | Yes | Yes | No  | Yes | 4             |
