# Supplementary material for: Smoking tobacco prevalence among college students in the Kingdom of Saudi Arabia: Systematic review and meta-analysis
Source: PubMed Central journal article supplement (PMC6662783; doi:10.18332/tid/105843), 2019-04-19

**Supplementary Figure 1.** Pooled estimate of smoking tobacco among all included studies (n=29).

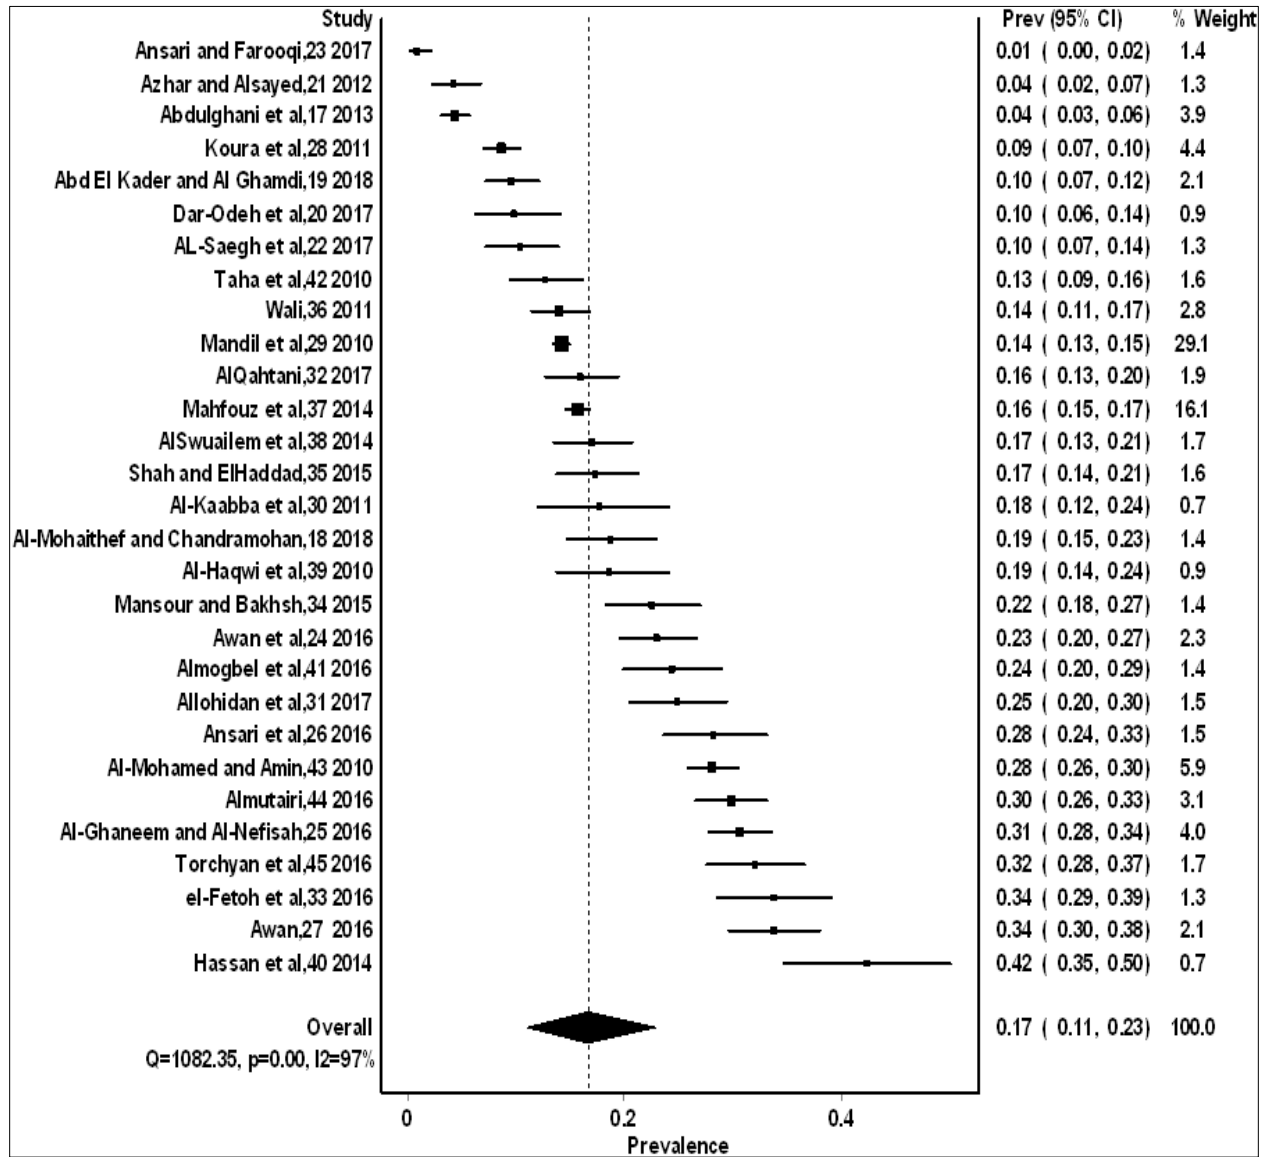

**Supplementary Figure 2.** Male prevalence of smoking after conducting the sensitivity analysis.

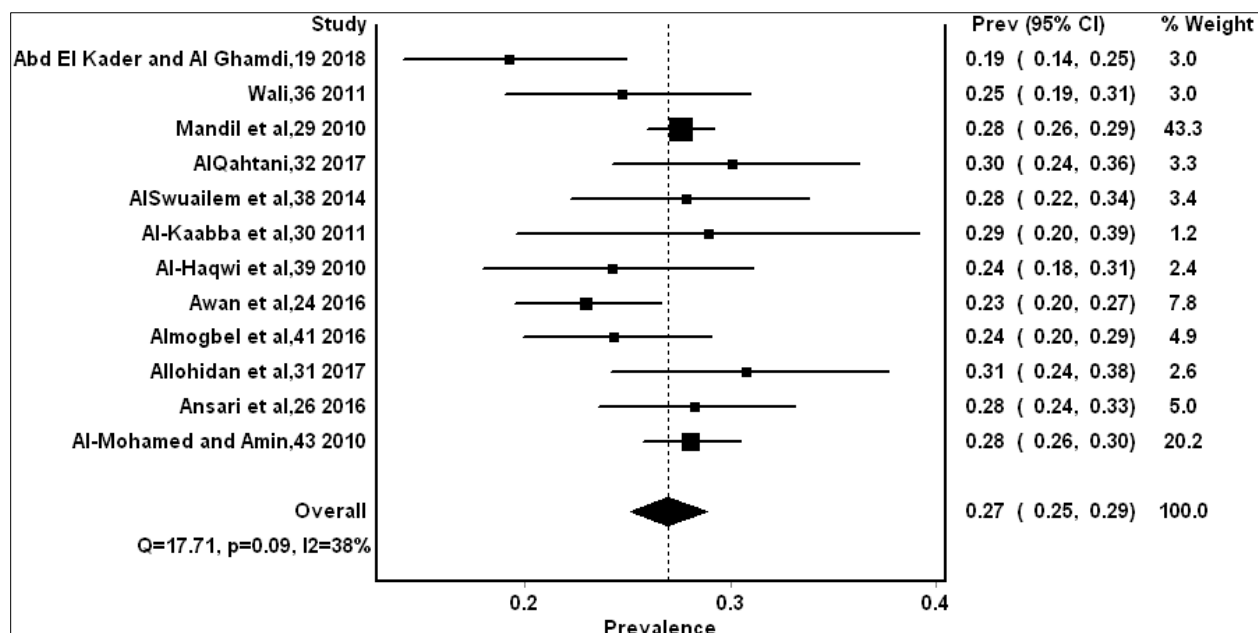

**Supplementary Figure 3.** Female prevalence of smoking after conducting the sensitivity analysis.

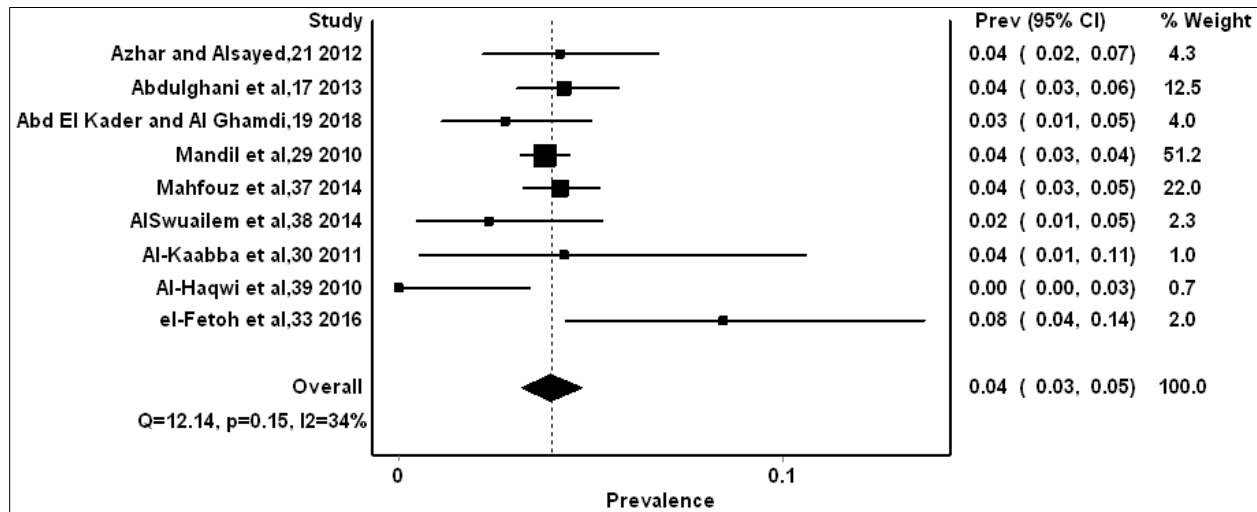

Supplement: TID-17-35-s2.pdf [file TID-17-35-s2.pdf]
